# Supplementary material for: Hunting for hydrogen: random structure searching and prediction of NMR parameters of hydrous wadsleyite
Source: Royal Society of Chemistry journal article supplement (doi:10.1039/c6cp01529h), 2016-01-01
Supplement: c6cp01529h1.pdf [file c6cp01529h1.pdf]

# Hunting for Hydrogen: Random Structure Searching and Prediction of NMR Parameters of Hydrous Wadsleyite

Robert F. Moran, David McKay, Chris J. Pickard, Andrew J. Berry,  
John M. Griffin and Sharon E. Ashbrook\*

## Supporting Information

- S1. Generation of structural models using AIRSS**
- S2. High-lying structures**
- S3. Supercell calculations**
- S4. Modified Smyth model**
- S5.  $^1\text{H } \delta_{\text{iso}}$  vs  $^2\text{H } C_q$**
- S6. Total enthalpies of computed structures**

## S1. Generation of structural models using AIRSS

The AIRSS input CELL file is shown below. The line “H 0.25... 0.25... 0.75... # H % NUM=2 POSAMP=3” instructs AIRSS to place two H atoms at the site of a Mg<sub>3</sub> vacancy and move each of them by a random distance (of maximum 3 Å). The global “#POSAMP=0” ensures the positions of the other atoms do not change, and “#MINSEP=0.75” ensures dihydrogen molecules are not generated.

### AIRSS CELL file:

```
%BLOCK LATTICE_CART
  11.4600000000000022      0.0000000000000000      0.0000000000000000
    0.0000000000000000      5.6921000000000002      0.0000000000000000
    0.0000000000000000      0.0000000000000000      8.2530000000000004

#FIX
%ENDBLOCK LATTICE_CART
FIX_ALL_CELL : true
%BLOCK POSITIONS_FRAC
  O  0.3729000000000000      0.9891999999999989      0.7428999999999997
  O -0.1271000000000000      0.4891999999999988      0.2428999999999997
  O  0.6271000000000000      0.5108000000000016      0.7428999999999997
  O  0.1271000000000000      0.0108000000000012      0.2428999999999998
  O  0.6271000000000000      0.4891999999999991      0.2571000000000003
  O  0.1271000000000000      0.9891999999999989      0.7571000000000002
  O  0.3729000000000000      0.0108000000000014      0.2571000000000003
  O -0.1271000000000000      0.5108000000000013      0.7571000000000002
  O  0.6271000000000000      0.0108000000000015      0.2571000000000003
  O  0.1271000000000000      0.5108000000000013      0.7571000000000002
  O  0.3729000000000000      0.4891999999999989      0.2571000000000003
  O -0.1271000000000000      0.9891999999999989      0.7571000000000002
  O  0.3729000000000000      0.5108000000000016      0.7428999999999999
  O -0.1271000000000000      0.0108000000000014      0.2428999999999998
  O  0.6271000000000000      0.9891999999999992      0.7428999999999999
  O  0.1271000000000000      0.4891999999999989      0.2428999999999997
  O  0.5000000000000000      0.2500000000000002      0.9686999999999999
  O  0.5000000000000000      0.2500000000000002      0.4667999999999997
  O -0.0000000000000000      0.7500000000000002      0.4687000000000000
  O -0.0000000000000000      0.7500000000000002      0.9667999999999998
  O  0.5000000000000000      0.7500000000000002      0.0313000000000001
  O  0.5000000000000000      0.7500000000000002      0.5332000000000003
  O -0.0000000000000000      0.2500000000000001      0.5313000000000001
  O -0.0000000000000000      0.2500000000000001      0.0332000000000004
  O  0.7394999999999993      0.7500000000000003      0.5056000000000003
  O  0.2394999999999991      0.2500000000000002      0.0056000000000003
  O  0.2605000000000010      0.7500000000000002      0.5056000000000003
  O -0.2394999999999992      0.2499999999999998      0.0056000000000002
  O  0.2605000000000010      0.2500000000000002      0.4943999999999998
  O -0.2394999999999992      0.7500000000000001      0.9943999999999998
  O  0.7394999999999993      0.2500000000000002      0.4943999999999998
  O  0.2394999999999991      0.7500000000000001      0.9943999999999998
  H  0.2500000000000000      0.2500000000000001      0.7499999999999999 # H % NUM=2
POSAMP=3
Mg  0.7500000000000001      0.2500000000000002      0.7500000000000001
Mg  0.7500000000000001      0.7500000000000002      0.2500000000000001
```

```

Mg 0.25000000000000001 0.75000000000000002 0.25000000000000000
Mg 0.00000000000000000 0.75000000000000001 0.22009999999999996
Mg 0.50000000000000000 0.25000000000000001 0.72009999999999996
Mg 0.00000000000000000 0.24999999999999999 0.77990000000000005
Mg 0.50000000000000000 0.75000000000000002 0.27990000000000004
Mg 0.37639999999999995 0.00000000000000001 0.00000000000000001
Mg 0.62360000000000007 0.50000000000000001 0.00000000000000001
Mg 0.12360000000000006 0.00000000000000001 0.50000000000000000
Mg 0.62360000000000007 0.00000000000000003 0.00000000000000001
Mg 0.12360000000000006 0.50000000000000000 0.50000000000000000
Mg 0.37639999999999995 0.50000000000000003 0.00000000000000001
Mg 0.87639999999999995 0.00000000000000003 0.50000000000000001
Mg 0.87639999999999995 0.50000000000000004 0.50000000000000001
Si 0.37010000000000000 0.25000000000000004 0.36659999999999987
Si -0.12990000000000002 0.75000000000000003 0.86659999999999986
Si 0.62990000000000002 0.24999999999999999 0.36659999999999987
Si 0.12990000000000001 0.74999999999999998 0.86659999999999986
Si 0.62990000000000002 0.75000000000000003 0.63340000000000014
Si 0.12990000000000001 0.25000000000000002 0.13340000000000015
Si 0.37010000000000000 0.75000000000000001 0.63340000000000015
Si -0.12990000000000002 0.24999999999999999 0.13340000000000015
%ENDBLOCK POSITIONS_FRAC

```

```

KPOINTS_MP_SPACING 0.1
SYMMETRY_GENERATE
SNAP_TO_SYMMETRY
#POSAMP=0
#SYMMOPS=1
#CONS=0.25
#MINSEP=0.75

```

An output CELL file generated from the AIRSS process, which can be used for further CASTEP calculations, is shown below.

### Generated CELL file:

```

%BLOCK LATTICE_CART
 11.4600000000000022 0.0000000000000000 0.0000000000000000
 0.0000000000000000 5.6921000000000002 0.0000000000000000
 0.00000000000000001 0.00000000000000001 8.2530000000000004
%ENDBLOCK LATTICE_CART

%BLOCK POSITIONS_FRAC
 O 0.37290000000000000 0.98919999999999999 0.74289999999999999
 O 0.87290000000000000 0.48919999999999999 0.24290000000000000
 O 0.62710000000000000 0.51080000000000002 0.74289999999999999
 O 0.12710000000000000 0.01080000000000001 0.24290000000000000
 O 0.62710000000000000 0.48919999999999999 0.25710000000000000
 O 0.12710000000000000 0.98919999999999999 0.75710000000000000
 O 0.37290000000000000 0.01080000000000001 0.25710000000000000
 O 0.87290000000000000 0.51080000000000001 0.75710000000000000
 O 0.62710000000000000 0.01080000000000001 0.25710000000000000
 O 0.12710000000000000 0.51080000000000001 0.75710000000000000
 O 0.37290000000000000 0.48919999999999999 0.25710000000000000
 O 0.87290000000000000 0.98919999999999999 0.75710000000000000
 O 0.37290000000000000 0.51080000000000002 0.74290000000000000
 O 0.87290000000000000 0.01080000000000001 0.24290000000000000
 O 0.62710000000000000 0.98919999999999999 0.74290000000000000

```

|    |                    |                    |                    |
|----|--------------------|--------------------|--------------------|
| O  | 0.1271000000000000 | 0.4891999999999999 | 0.2429000000000000 |
| O  | 0.5000000000000000 | 0.2500000000000000 | 0.9687000000000000 |
| O  | 0.5000000000000000 | 0.2500000000000000 | 0.4668000000000000 |
| O  | 0.0000000000000000 | 0.7500000000000000 | 0.4687000000000000 |
| O  | 0.0000000000000000 | 0.7500000000000000 | 0.9667999999999999 |
| O  | 0.5000000000000000 | 0.7500000000000000 | 0.0313000000000000 |
| O  | 0.5000000000000000 | 0.7500000000000000 | 0.5332000000000000 |
| O  | 1.0000000000000000 | 0.2500000000000000 | 0.5313000000000000 |
| O  | 1.0000000000000000 | 0.2500000000000000 | 0.0332000000000000 |
| O  | 0.7394999999999999 | 0.7500000000000000 | 0.5056000000000000 |
| O  | 0.2394999999999999 | 0.2500000000000000 | 0.0056000000000000 |
| O  | 0.2605000000000001 | 0.7500000000000000 | 0.5056000000000000 |
| O  | 0.7605000000000001 | 0.2500000000000000 | 0.0056000000000000 |
| O  | 0.2605000000000001 | 0.2500000000000000 | 0.4944000000000000 |
| O  | 0.7605000000000001 | 0.7500000000000000 | 0.9944000000000000 |
| O  | 0.7394999999999999 | 0.2500000000000000 | 0.4944000000000000 |
| O  | 0.2394999999999999 | 0.7500000000000000 | 0.9944000000000000 |
| H  | 0.192711168454776  | 0.786679356198195  | 0.849206932585415  |
| H  | 0.413222667096391  | 0.081108848047837  | 0.858053016559826  |
| Mg | 0.7500000000000000 | 0.2500000000000000 | 0.7500000000000000 |
| Mg | 0.7500000000000000 | 0.7500000000000000 | 0.2500000000000000 |
| Mg | 0.2500000000000000 | 0.7500000000000000 | 0.2500000000000000 |
| Mg | 1.0000000000000000 | 0.7500000000000000 | 0.2201000000000000 |
| Mg | 0.5000000000000000 | 0.2500000000000000 | 0.7200999999999999 |
| Mg | 0.0000000000000000 | 0.2500000000000000 | 0.7799000000000000 |
| Mg | 0.5000000000000000 | 0.7500000000000000 | 0.2799000000000000 |
| Mg | 0.3763999999999999 | 0.0000000000000000 | 0.0000000000000000 |
| Mg | 0.6236000000000001 | 0.5000000000000000 | 0.0000000000000000 |
| Mg | 0.1236000000000001 | 0.0000000000000000 | 0.5000000000000000 |
| Mg | 0.6236000000000001 | 0.0000000000000000 | 0.0000000000000000 |
| Mg | 0.1236000000000001 | 0.5000000000000000 | 0.5000000000000000 |
| Mg | 0.3763999999999999 | 0.5000000000000000 | 0.0000000000000000 |
| Mg | 0.8763999999999999 | 0.0000000000000000 | 0.5000000000000000 |
| Mg | 0.8763999999999999 | 0.5000000000000001 | 0.5000000000000000 |
| Si | 0.3701000000000000 | 0.2500000000000000 | 0.3665999999999999 |
| Si | 0.8701000000000000 | 0.7500000000000000 | 0.8665999999999998 |
| Si | 0.6299000000000000 | 0.2500000000000000 | 0.3665999999999999 |
| Si | 0.123807630730438  | 0.746442285854145  | 0.868287040569803  |
| Si | 0.6299000000000000 | 0.7500000000000000 | 0.6334000000000001 |
| Si | 0.1299000000000000 | 0.2500000000000000 | 0.1334000000000001 |
| Si | 0.3701000000000000 | 0.7500000000000000 | 0.6334000000000001 |
| Si | 0.8701000000000000 | 0.2500000000000000 | 0.1334000000000001 |

%ENDBLOCK POSITIONS\_FRAC

## S2. High-lying structures

High-enthalpy structures were found to include those containing more than one silanol (Si–OH) group, O2 hydroxyls, or O1 hydroxyls orientated away from the Mg3 vacancy. From the 103 fully optimised structures, only one was found to contain an O2 hydroxyl (see [Figure S2.1](#)), while a total of five were found to contain unfavourably oriented O1 hydroxyls (see [Figure S2.2](#)).

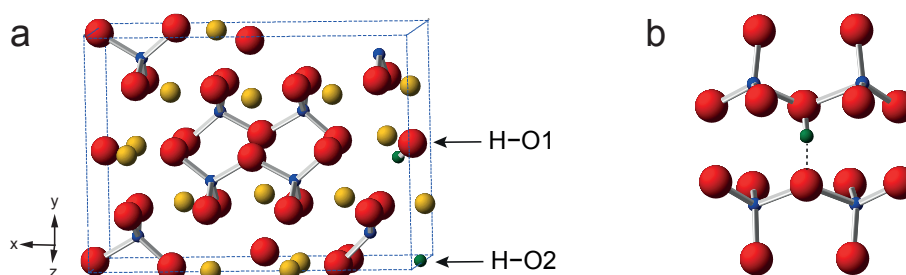

**Figure S2.1:** (a) Schematic showing the unit cell of the one structure (ranked 93/103) found to contain an O2 hydroxyl, (b) expansion of the O2 hydroxyl environment, with hydrogen, silicon, magnesium and oxygen shown in green, blue, yellow and red, respectively.

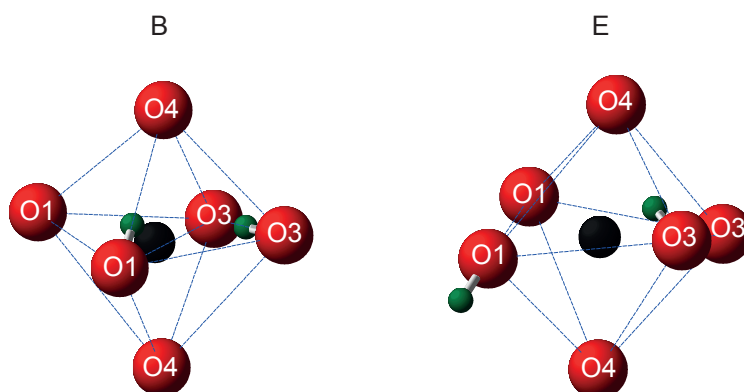

**Figure S2.2:** Schematic showing an O1 hydroxyl pointing towards (B) and away from (E) the Mg3 vacancy. For structures A-D see main text.

### S3. Supercell calculations

Supercell structures were generated based on the most stable fully-optimised AIRSS generated structure (structure **A**, see main text) as  $2 \times 2 \times 1$  supercells. A geometry optimisation was then performed on all atomic positions with the lattice parameters fixed. These resulted in structures with  $4 \times \text{Mg3}$  vacancies and  $8 \times \text{H}$  atoms. The unchanged structure (*i.e.*, with  $8 \times \text{O1-H}$  hydroxyls) provided a new enthalpy minimum (supercell **I**, [Figure S3.1](#)). For supercell **II** one H was moved to give an  $\text{O3-H}$  hydroxyl group (*cf.* **B**), giving  $1 \times \text{O3-H}$  and  $7 \times \text{O1-H}$  hydroxyls. Supercell **III** similarly has a single  $\text{O4-H}$  and  $7 \times \text{O1-H}$  hydroxyls (*cf.* **C**). In such a model, the ratio of "defect" hydroxyls to hydroxyls bound to O1 is 1:7, rather than 1:1 as required in unit cell models. Supercell **IV** contains  $8 \times \text{O1-H}$  hydroxyls, equivalent to **I**, showing that increasing the system size allows the  $\text{Mg3}$  vacancies (and corresponding protons) to be spread about the system, increasing separation of like charges; an arrangement not available in the unit cell.

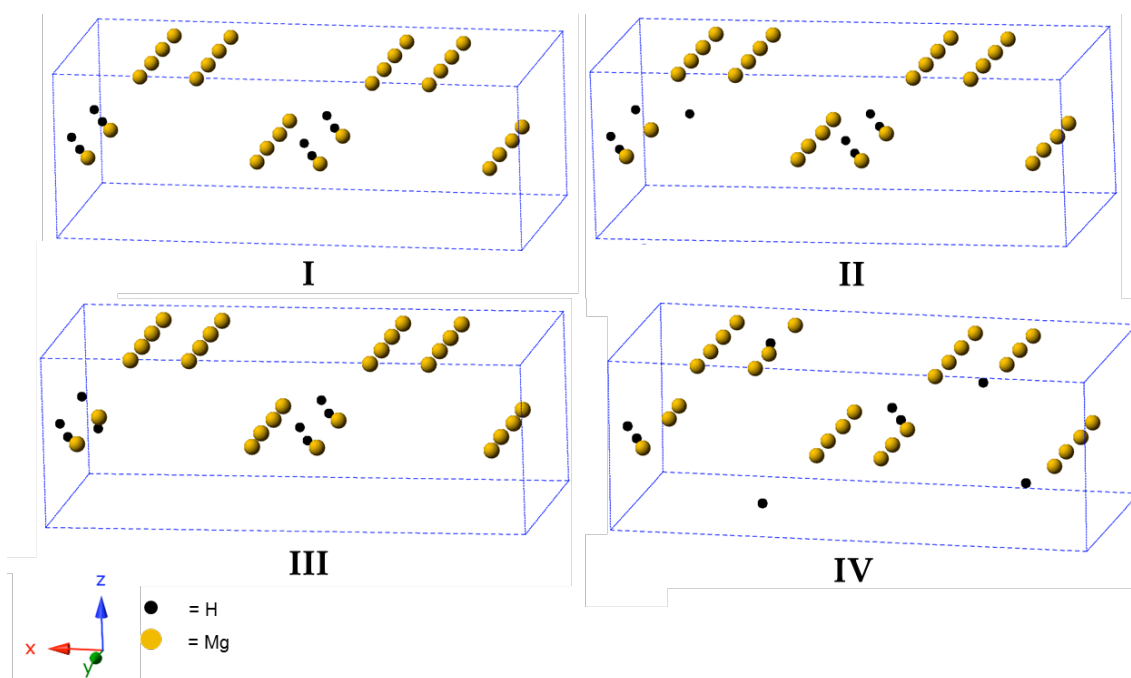

**Figure S3.1:** Optimised  $2 \times 2 \times 1$  supercells **I**, based on **A**; **II**, with a single  $\text{O3-H}$  hydroxyl (as found in **B**); **III**, with a single  $\text{O4-H}$  hydroxyl (as found in **C**) and **IV**, with  $\text{Mg3}$  vacancies and  $8 \times \text{O1-H}$  hydroxyls spread to maximise separation of like charges. Si, O, Mg1 and Mg2 atoms omitted to allow focus on  $\text{Mg3}$  atoms (yellow) and H (black).

The same change is induced going from **I** to **II** to **III** as from **A** to **B** to **C**, in that a proton is moved from a favourable O1–H···O4 environment to a less favourable position. Therefore, relative enthalpies are equivalent (with slight differences owing to the increased flexibility of the supercell system) at  $\Delta H = 0.00, 0.47$  and  $0.56$  eV for **I**, **II** and **III** respectively (Table S3.1). However, taking into account the change per formula unit with the 4-fold increase in system size from  $\text{Mg}_{12}\text{Si}_8\text{O}_{32}\text{H}_2$  to  $\text{Mg}_{60}\text{Si}_{32}\text{O}_{128}\text{H}_8$  gives  $\Delta H = 0.00, 0.12$  and  $0.14$  eV/unit. As such the increased positional entropy available to the supercell system alleviates some of the enthalpy cost of forming a less stable H environment. Therefore O3–H and O4–H hydroxyl groups are considered to form as defects while O1–H hydroxyls predominate. In the case of supercell **IV**, the increased flexibility of the supercell approach has allowed for an improvement due to greater spread of Mg3 vacancies, giving  $\Delta H = -0.14$  eV/unit (*i.e.*, below **I**).

**Table S3.1:** Comparison of relative enthalpies ( $\Delta H$ ) of supercells showing the reduction in  $\Delta H$  as O3–H and O4–H hydroxyls are treated as defects and as Mg3 vacancies are spread in the supercell.

| Structure  | $\Delta H$ / eV | $\Delta H/4$ / eV |
|------------|-----------------|-------------------|
| <b>I</b>   | 0.00            | 0.00              |
| <b>II</b>  | 0.47            | 0.12              |
| <b>III</b> | 0.56            | 0.14              |
| <b>IV</b>  | -0.56           | -0.14             |

<sup>a</sup> *i.e.*, corresponding to the per formula unit increase in the supercell structures.

## S4. Modified Smyth model

The original Smyth structure represented a fully hydrated (~3.3 wt%) system, thus requiring some modification before it could be compared to the AIRSS-generated structures, which were based on a ~1.6 wt% hydration level. The modification simply involved replacing two protons with a magnesium on an Mg2 site, leaving two hydroxyls aligned parallel to the z-axis in close proximity to the remaining Mg2 vacancy, as shown in [Figure S4.1](#). This structure was then geometry optimised to calculate the relative enthalpy.

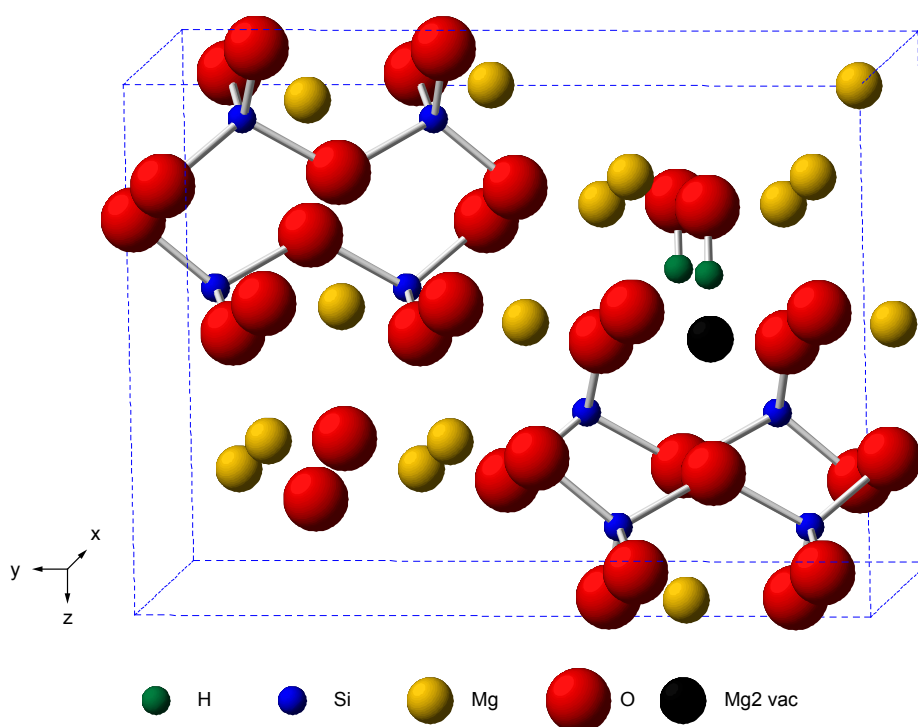

**Figure S4.1:** Smyth structure modified to result in a ~1.6 wt% hydration level.



## S5. $^1\text{H } \delta_{\text{iso}}$ vs $^2\text{H } C_Q$

A plot of  $^2\text{H } C_Q$  against  $^1\text{H } \delta_{\text{iso}}$  is shown in [Figure S5.1](#). It shows that, although O1 hydroxyls can be separated from silanol hydroxyls using a combination of  $^1\text{H } \delta_{\text{iso}}$  and  $^2\text{H } C_Q$ , it is much more difficult to differentiate between the crystallographically-similar pyrosilicate oxygen sites, particularly the O3 and O4.

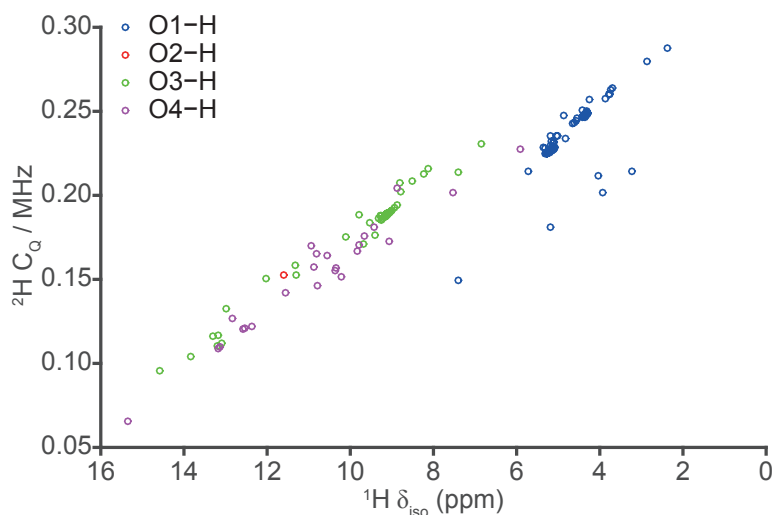

**Figure S5.1:** Plot of calculated  $^2\text{H } C_Q$  against  $^1\text{H } \delta_{\text{iso}}$  for all 103 fully-optimised AIRSS-generated structures of hydrous wadsleyite.

## S6. Total enthalpies of computed structures

**Table S6.1:** Total enthalpies of AIRSS-generated structures (see [Figure 2](#)).

| Index | Enthalpy / eV |    |             |     |             |
|-------|---------------|----|-------------|-----|-------------|
| 1     | -29557.6020   | 43 | -29557.5719 | 86  | -29557.1299 |
| 2     | -29557.6017   | 44 | -29557.5714 | 87  | -29557.1253 |
| 3     | -29557.6000   | 45 | -29557.5711 | 88  | -29557.1251 |
| 4     | -29557.5966   | 46 | -29557.5710 | 89  | -29557.1235 |
| 5     | -29557.5956   | 47 | -29557.5707 | 90  | -29557.1230 |
| 6     | -29557.5949   | 48 | -29557.5706 | 91  | -29557.1222 |
| 7     | -29557.5927   | 49 | -29557.5705 | 92  | -29557.1207 |
| 8     | -29557.5926   | 50 | -29557.5702 | 93  | -29557.1195 |
| 9     | -29557.5918   | 51 | -29557.5702 | 94  | -29557.1174 |
| 10    | -29557.5901   | 52 | -29557.5697 | 95  | -29557.1167 |
| 11    | -29557.5895   | 53 | -29557.5697 | 96  | -29557.1164 |
| 12    | -29557.5877   | 54 | -29557.5695 | 97  | -29557.1163 |
| 13    | -29557.5876   | 55 | -29557.5695 | 98  | -29557.1161 |
| 14    | -29557.5873   | 56 | -29557.5688 | 99  | -29557.1156 |
| 15    | -29557.5860   | 57 | -29557.5686 | 100 | -29557.1130 |
| 16    | -29557.5845   | 58 | -29557.5684 | 101 | -29557.1102 |
| 17    | -29557.5842   | 59 | -29557.5676 | 102 | -29557.1081 |
| 18    | -29557.5818   | 60 | -29557.5676 | 103 | -29557.1067 |
| 19    | -29557.5816   | 61 | -29557.5675 | 104 | -29557.1060 |
| 20    | -29557.5814   | 62 | -29557.5671 | 105 | -29557.1059 |
| 21    | -29557.5813   | 63 | -29557.5668 | 106 | -29557.1038 |
| 22    | -29557.5812   | 64 | -29557.5667 | 107 | -29557.1015 |
| 23    | -29557.5803   | 65 | -29557.5664 | 108 | -29557.1014 |
| 24    | -29557.5800   | 66 | -29557.5655 | 109 | -29557.1014 |
| 25    | -29557.5795   | 67 | -29557.5653 | 110 | -29557.1011 |
| 26    | -29557.5792   | 68 | -29557.5652 | 111 | -29557.0997 |
| 27    | -29557.5790   | 69 | -29557.5650 | 112 | -29557.0989 |
| 28    | -29557.5777   | 70 | -29557.5646 | 113 | -29557.0985 |
| 29    | -29557.5767   | 71 | -29557.5646 | 114 | -29557.0967 |
| 30    | -29557.5766   | 72 | -29557.5642 | 115 | -29557.0965 |
| 31    | -29557.5757   | 73 | -29557.5642 | 116 | -29557.0962 |
| 32    | -29557.5754   | 74 | -29557.5640 | 117 | -29557.0959 |
| 33    | -29557.5752   | 75 | -29557.5637 | 118 | -29557.0958 |
| 34    | -29557.5752   | 76 | -29557.5635 | 119 | -29557.0958 |
| 35    | -29557.5748   | 77 | -29557.1435 | 120 | -29557.0956 |
| 36    | -29557.5741   | 78 | -29557.1401 | 121 | -29557.0942 |
| 37    | -29557.5737   | 79 | -29557.1378 | 122 | -29557.0939 |
| 38    | -29557.5733   | 80 | -29557.1366 | 123 | -29557.0937 |
| 39    | -29557.5730   | 81 | -29557.1339 | 124 | -29557.0934 |
| 40    | -29557.5728   | 82 | -29557.1335 | 125 | -29557.0931 |
| 41    | -29557.5727   | 83 | -29557.1334 | 126 | -29557.0930 |
| 42    | -29557.5719   | 84 | -29557.1318 | 127 | -29557.0929 |
|       |               | 85 | -29557.1304 | 128 | -29557.0922 |

|     |             |     |             |     |             |
|-----|-------------|-----|-------------|-----|-------------|
| 129 | -29557.0917 | 176 | -29557.0772 | 223 | -29557.0639 |
| 130 | -29557.0916 | 177 | -29557.0771 | 224 | -29557.0629 |
| 131 | -29557.0908 | 178 | -29557.0770 | 225 | -29557.0622 |
| 132 | -29557.0895 | 179 | -29557.0769 | 226 | -29557.0621 |
| 133 | -29557.0893 | 180 | -29557.0768 | 227 | -29557.0614 |
| 134 | -29557.0883 | 181 | -29557.0767 | 228 | -29557.0613 |
| 135 | -29557.0878 | 182 | -29557.0765 | 229 | -29557.0598 |
| 136 | -29557.0878 | 183 | -29557.0765 | 230 | -29557.0596 |
| 137 | -29557.0877 | 184 | -29557.0760 | 231 | -29557.0595 |
| 138 | -29557.0873 | 185 | -29557.0759 | 232 | -29557.0592 |
| 139 | -29557.0872 | 186 | -29557.0759 | 233 | -29557.0591 |
| 140 | -29557.0865 | 187 | -29557.0758 | 234 | -29557.0578 |
| 141 | -29557.0864 | 188 | -29557.0754 | 235 | -29557.0577 |
| 142 | -29557.0863 | 189 | -29557.0750 | 236 | -29557.0576 |
| 143 | -29557.0863 | 190 | -29557.0747 | 237 | -29557.0573 |
| 144 | -29557.0862 | 191 | -29557.0747 | 238 | -29557.0565 |
| 145 | -29557.0861 | 192 | -29557.0747 | 239 | -29557.0562 |
| 146 | -29557.0860 | 193 | -29557.0744 | 240 | -29557.0561 |
| 147 | -29557.0853 | 194 | -29557.0742 | 241 | -29557.0560 |
| 148 | -29557.0848 | 195 | -29557.0740 | 242 | -29557.0559 |
| 149 | -29557.0839 | 196 | -29557.0738 | 243 | -29557.0548 |
| 150 | -29557.0831 | 197 | -29557.0738 | 244 | -29557.0542 |
| 151 | -29557.0828 | 198 | -29557.0736 | 245 | -29557.0539 |
| 152 | -29557.0828 | 199 | -29557.0736 | 246 | -29557.0522 |
| 153 | -29557.0822 | 200 | -29557.0728 | 247 | -29557.0516 |
| 154 | -29557.0821 | 201 | -29557.0725 | 248 | -29557.0514 |
| 155 | -29557.0820 | 202 | -29557.0723 | 249 | -29557.0512 |
| 156 | -29557.0817 | 203 | -29557.0718 | 250 | -29557.0503 |
| 157 | -29557.0816 | 204 | -29557.0714 | 251 | -29557.0498 |
| 158 | -29557.0816 | 205 | -29557.0714 | 252 | -29557.0495 |
| 159 | -29557.0814 | 206 | -29557.0714 | 253 | -29557.0480 |
| 160 | -29557.0812 | 207 | -29557.0713 | 254 | -29557.0474 |
| 161 | -29557.0810 | 208 | -29557.0706 | 255 | -29557.0464 |
| 162 | -29557.0803 | 209 | -29557.0701 | 256 | -29557.0463 |
| 163 | -29557.0799 | 210 | -29557.0699 | 257 | -29557.0459 |
| 164 | -29557.0797 | 211 | -29557.0698 | 258 | -29557.0459 |
| 165 | -29557.0794 | 212 | -29557.0690 | 259 | -29557.0446 |
| 166 | -29557.0792 | 213 | -29557.0683 | 260 | -29557.0401 |
| 167 | -29557.0791 | 214 | -29557.0672 | 261 | -29557.0387 |
| 168 | -29557.0790 | 215 | -29557.0667 | 262 | -29557.0380 |
| 169 | -29557.0786 | 216 | -29557.0665 | 263 | -29557.0378 |
| 170 | -29557.0786 | 217 | -29557.0662 | 264 | -29557.0367 |
| 171 | -29557.0783 | 218 | -29557.0657 | 265 | -29557.0364 |
| 172 | -29557.0780 | 219 | -29557.0652 | 266 | -29557.0359 |
| 173 | -29557.0778 | 220 | -29557.0649 | 267 | -29557.0356 |
| 174 | -29557.0775 | 221 | -29557.0644 | 268 | -29557.0348 |
| 175 | -29557.0772 | 222 | -29557.0640 | 269 | -29557.0341 |

|     |             |     |             |     |             |
|-----|-------------|-----|-------------|-----|-------------|
| 270 | -29557.0328 | 317 | -29557.0184 | 364 | -29557.0026 |
| 271 | -29557.0322 | 318 | -29557.0183 | 365 | -29557.0015 |
| 272 | -29557.0321 | 319 | -29557.0183 | 366 | -29557.0012 |
| 273 | -29557.0314 | 320 | -29557.0182 | 367 | -29557.0010 |
| 274 | -29557.0302 | 321 | -29557.0181 | 368 | -29557.0009 |
| 275 | -29557.0300 | 322 | -29557.0175 | 369 | -29557.0004 |
| 276 | -29557.0296 | 323 | -29557.0171 | 370 | -29556.9966 |
| 277 | -29557.0290 | 324 | -29557.0169 | 371 | -29556.9964 |
| 278 | -29557.0288 | 325 | -29557.0169 | 372 | -29556.9962 |
| 279 | -29557.0284 | 326 | -29557.0168 | 373 | -29556.9956 |
| 280 | -29557.0284 | 327 | -29557.0167 | 374 | -29556.9955 |
| 281 | -29557.0279 | 328 | -29557.0164 | 375 | -29556.9954 |
| 282 | -29557.0278 | 329 | -29557.0160 | 376 | -29556.9954 |
| 283 | -29557.0270 | 330 | -29557.0150 | 377 | -29556.9943 |
| 284 | -29557.0267 | 331 | -29557.0147 | 378 | -29556.9939 |
| 285 | -29557.0263 | 332 | -29557.0145 | 379 | -29556.9931 |
| 286 | -29557.0256 | 333 | -29557.0144 | 380 | -29556.9927 |
| 287 | -29557.0256 | 334 | -29557.0141 | 381 | -29556.9909 |
| 288 | -29557.0255 | 335 | -29557.0132 | 382 | -29556.9886 |
| 289 | -29557.0255 | 336 | -29557.0128 | 383 | -29556.9885 |
| 290 | -29557.0254 | 337 | -29557.0120 | 384 | -29556.9884 |
| 291 | -29557.0242 | 338 | -29557.0120 | 385 | -29556.9851 |
| 292 | -29557.0240 | 339 | -29557.0119 | 386 | -29556.9844 |
| 293 | -29557.0238 | 340 | -29557.0096 | 387 | -29556.9837 |
| 294 | -29557.0235 | 341 | -29557.0094 | 388 | -29556.9826 |
| 295 | -29557.0232 | 342 | -29557.0094 | 389 | -29556.9824 |
| 296 | -29557.0230 | 343 | -29557.0086 | 390 | -29556.9823 |
| 297 | -29557.0228 | 344 | -29557.0073 | 391 | -29556.9818 |
| 298 | -29557.0227 | 345 | -29557.0072 | 392 | -29556.9803 |
| 299 | -29557.0226 | 346 | -29557.0068 | 393 | -29556.9798 |
| 300 | -29557.0226 | 347 | -29557.0063 | 394 | -29556.9797 |
| 301 | -29557.0223 | 348 | -29557.0061 | 395 | -29556.9793 |
| 302 | -29557.0221 | 349 | -29557.0060 | 396 | -29556.9793 |
| 303 | -29557.0218 | 350 | -29557.0059 | 397 | -29556.9788 |
| 304 | -29557.0218 | 351 | -29557.0057 | 398 | -29556.9785 |
| 305 | -29557.0217 | 352 | -29557.0052 | 399 | -29556.9782 |
| 306 | -29557.0213 | 353 | -29557.0050 | 400 | -29556.9779 |
| 307 | -29557.0207 | 354 | -29557.0045 | 401 | -29556.9778 |
| 308 | -29557.0206 | 355 | -29557.0045 | 402 | -29556.9774 |
| 309 | -29557.0203 | 356 | -29557.0044 | 403 | -29556.9770 |
| 310 | -29557.0202 | 357 | -29557.0039 | 404 | -29556.9770 |
| 311 | -29557.0200 | 358 | -29557.0038 | 405 | -29556.9769 |
| 312 | -29557.0200 | 359 | -29557.0033 | 406 | -29556.9768 |
| 313 | -29557.0191 | 360 | -29557.0032 | 407 | -29556.9766 |
| 314 | -29557.0190 | 361 | -29557.0031 | 408 | -29556.9761 |
| 315 | -29557.0188 | 362 | -29557.0030 | 409 | -29556.9757 |
| 316 | -29557.0185 | 363 | -29557.0030 | 410 | -29556.9754 |

|     |             |     |             |     |             |
|-----|-------------|-----|-------------|-----|-------------|
| 411 | -29556.9750 | 458 | -29556.8250 | 505 | -29556.8013 |
| 412 | -29556.9747 | 459 | -29556.8245 | 506 | -29556.8013 |
| 413 | -29556.9746 | 460 | -29556.8228 | 507 | -29556.8010 |
| 414 | -29556.9738 | 461 | -29556.8226 | 508 | -29556.8010 |
| 415 | -29556.9728 | 462 | -29556.8217 | 509 | -29556.8008 |
| 416 | -29556.9718 | 463 | -29556.8207 | 510 | -29556.8000 |
| 417 | -29556.9718 | 464 | -29556.8202 | 511 | -29556.7998 |
| 418 | -29556.9706 | 465 | -29556.8191 | 512 | -29556.7994 |
| 419 | -29556.9706 | 466 | -29556.8185 | 513 | -29556.7987 |
| 420 | -29556.9698 | 467 | -29556.8176 | 514 | -29556.7982 |
| 421 | -29556.9696 | 468 | -29556.8166 | 515 | -29556.7981 |
| 422 | -29556.9694 | 469 | -29556.8160 | 516 | -29556.7979 |
| 423 | -29556.9693 | 470 | -29556.8151 | 517 | -29556.7977 |
| 424 | -29556.9676 | 471 | -29556.8147 | 518 | -29556.7971 |
| 425 | -29556.9673 | 472 | -29556.8144 | 519 | -29556.7970 |
| 426 | -29556.9670 | 473 | -29556.8136 | 520 | -29556.7967 |
| 427 | -29556.9656 | 474 | -29556.8116 | 521 | -29556.7966 |
| 428 | -29556.9640 | 475 | -29556.8109 | 522 | -29556.7964 |
| 429 | -29556.9639 | 476 | -29556.8097 | 523 | -29556.7958 |
| 430 | -29556.9637 | 477 | -29556.8097 | 524 | -29556.7955 |
| 431 | -29556.9634 | 478 | -29556.8096 | 525 | -29556.7953 |
| 432 | -29556.9611 | 479 | -29556.8095 | 526 | -29556.7941 |
| 433 | -29556.9609 | 480 | -29556.8094 | 527 | -29556.7906 |
| 434 | -29556.9602 | 481 | -29556.8092 | 528 | -29556.7871 |
| 435 | -29556.9565 | 482 | -29556.8088 | 529 | -29556.7870 |
| 436 | -29556.9558 | 483 | -29556.8087 | 530 | -29556.7859 |
| 437 | -29556.9555 | 484 | -29556.8082 | 531 | -29556.7748 |
| 438 | -29556.9500 | 485 | -29556.8081 | 532 | -29556.7696 |
| 439 | -29556.9470 | 486 | -29556.8076 | 533 | -29556.7671 |
| 440 | -29556.9380 | 487 | -29556.8064 | 534 | -29556.7122 |
| 441 | -29556.9376 | 488 | -29556.8063 | 535 | -29556.7056 |
| 442 | -29556.9268 | 489 | -29556.8062 | 536 | -29556.7008 |
| 443 | -29556.9263 | 490 | -29556.8059 | 537 | -29556.6957 |
| 444 | -29556.9260 | 491 | -29556.8052 | 538 | -29556.6570 |
| 445 | -29556.9219 | 492 | -29556.8051 | 539 | -29556.6518 |
| 446 | -29556.9214 | 493 | -29556.8048 | 540 | -29556.6470 |
| 447 | -29556.9205 | 494 | -29556.8047 | 541 | -29556.6425 |
| 448 | -29556.9159 | 495 | -29556.8041 | 542 | -29556.6418 |
| 449 | -29556.8469 | 496 | -29556.8035 | 543 | -29556.6400 |
| 450 | -29556.8388 | 497 | -29556.8032 | 544 | -29556.6387 |
| 451 | -29556.8350 | 498 | -29556.8024 | 545 | -29556.6342 |
| 452 | -29556.8333 | 499 | -29556.8024 | 546 | -29556.6239 |
| 453 | -29556.8312 | 500 | -29556.8024 | 547 | -29556.6045 |
| 454 | -29556.8301 | 501 | -29556.8023 | 548 | -29556.6005 |
| 455 | -29556.8290 | 502 | -29556.8019 | 549 | -29556.5354 |
| 456 | -29556.8265 | 503 | -29556.8019 | 550 | -29556.5301 |
| 457 | -29556.8263 | 504 | -29556.8018 | 551 | -29556.5264 |

|     |             |     |             |     |             |
|-----|-------------|-----|-------------|-----|-------------|
| 552 | -29556.5263 | 599 | -29556.3780 | 646 | -29556.2412 |
| 553 | -29556.5249 | 600 | -29556.3777 | 647 | -29556.2400 |
| 554 | -29556.5202 | 601 | -29556.3776 | 648 | -29556.2385 |
| 555 | -29556.5158 | 602 | -29556.3775 | 649 | -29556.2376 |
| 556 | -29556.5145 | 603 | -29556.3750 | 650 | -29556.2367 |
| 557 | -29556.5120 | 604 | -29556.3740 | 651 | -29556.2347 |
| 558 | -29556.5104 | 605 | -29556.3738 | 652 | -29556.2342 |
| 559 | -29556.5104 | 606 | -29556.3736 | 653 | -29556.2311 |
| 560 | -29556.5099 | 607 | -29556.3211 | 654 | -29556.2279 |
| 561 | -29556.5098 | 608 | -29556.3005 | 655 | -29556.2142 |
| 562 | -29556.5068 | 609 | -29556.2979 | 656 | -29556.2128 |
| 563 | -29556.5058 | 610 | -29556.2960 | 657 | -29556.2058 |
| 564 | -29556.5044 | 611 | -29556.2941 | 658 | -29556.1428 |
| 565 | -29556.5036 | 612 | -29556.2941 | 659 | -29556.1404 |
| 566 | -29556.5014 | 613 | -29556.2895 | 660 | -29556.1396 |
| 567 | -29556.5000 | 614 | -29556.2859 | 661 | -29556.1370 |
| 568 | -29556.4999 | 615 | -29556.2849 | 662 | -29556.1332 |
| 569 | -29556.4997 | 616 | -29556.2840 | 663 | -29556.1152 |
| 570 | -29556.4949 | 617 | -29556.2836 | 664 | -29556.1141 |
| 571 | -29556.4949 | 618 | -29556.2819 | 665 | -29556.1136 |
| 572 | -29556.4941 | 619 | -29556.2802 | 666 | -29556.1105 |
| 573 | -29556.4922 | 620 | -29556.2799 | 667 | -29556.1079 |
| 574 | -29556.4911 | 621 | -29556.2798 | 668 | -29556.1074 |
| 575 | -29556.4904 | 622 | -29556.2795 | 669 | -29556.1063 |
| 576 | -29556.4903 | 623 | -29556.2785 | 670 | -29556.1057 |
| 577 | -29556.4888 | 624 | -29556.2775 | 671 | -29556.1053 |
| 578 | -29556.4885 | 625 | -29556.2775 | 672 | -29556.1048 |
| 579 | -29556.4867 | 626 | -29556.2768 | 673 | -29556.1037 |
| 580 | -29556.4861 | 627 | -29556.2748 | 674 | -29556.1030 |
| 581 | -29556.4858 | 628 | -29556.2742 | 675 | -29556.1028 |
| 582 | -29556.4856 | 629 | -29556.2732 | 676 | -29556.0981 |
| 583 | -29556.4851 | 630 | -29556.2726 | 677 | -29556.0931 |
| 584 | -29556.4851 | 631 | -29556.2709 | 678 | -29556.0145 |
| 585 | -29556.4850 | 632 | -29556.2702 | 679 | -29556.0129 |
| 586 | -29556.4848 | 633 | -29556.2701 | 680 | -29556.0079 |
| 587 | -29556.4834 | 634 | -29556.2698 | 681 | -29556.0055 |
| 588 | -29556.4831 | 635 | -29556.2683 | 682 | -29556.0043 |
| 589 | -29556.4792 | 636 | -29556.2679 | 683 | -29555.9979 |
| 590 | -29556.4172 | 637 | -29556.2657 | 684 | -29555.9959 |
| 591 | -29556.4134 | 638 | -29556.2643 | 685 | -29555.9932 |
| 592 | -29556.4042 | 639 | -29556.2624 | 686 | -29555.9899 |
| 593 | -29556.3920 | 640 | -29556.2591 | 687 | -29555.8784 |
| 594 | -29556.3872 | 641 | -29556.2555 | 688 | -29555.8657 |
| 595 | -29556.3852 | 642 | -29556.2527 | 689 | -29555.7831 |
| 596 | -29556.3839 | 643 | -29556.2495 | 690 | -29555.7627 |
| 597 | -29556.3788 | 644 | -29556.2444 | 691 | -29555.7576 |
| 598 | -29556.3787 | 645 | -29556.2427 | 692 | -29555.7454 |

|     |             |     |             |     |             |
|-----|-------------|-----|-------------|-----|-------------|
| 693 | -29555.7439 | 740 | -29555.5964 | 787 | -29554.9047 |
| 694 | -29555.7393 | 741 | -29555.5934 | 788 | -29554.9021 |
| 695 | -29555.7288 | 742 | -29555.5931 | 789 | -29554.9019 |
| 696 | -29555.7238 | 743 | -29555.5886 | 790 | -29554.9011 |
| 697 | -29555.7219 | 744 | -29555.5884 | 791 | -29554.9010 |
| 698 | -29555.7204 | 745 | -29555.5879 | 792 | -29554.9005 |
| 699 | -29555.7196 | 746 | -29555.5834 | 793 | -29554.8957 |
| 700 | -29555.7183 | 747 | -29555.5818 | 794 | -29554.8923 |
| 701 | -29555.7173 | 748 | -29555.5818 | 795 | -29554.8900 |
| 702 | -29555.7125 | 749 | -29555.5800 | 796 | -29554.8256 |
| 703 | -29555.7121 | 750 | -29555.5793 | 797 | -29554.7112 |
| 704 | -29555.7120 | 751 | -29555.5769 | 798 | -29554.7087 |
| 705 | -29555.7114 | 752 | -29555.5751 | 799 | -29554.7085 |
| 706 | -29555.7085 | 753 | -29555.5751 | 800 | -29554.7047 |
| 707 | -29555.7062 | 754 | -29555.5714 | 801 | -29554.6438 |
| 708 | -29555.7053 | 755 | -29555.5689 | 802 | -29554.6403 |
| 709 | -29555.7032 | 756 | -29555.5651 | 803 | -29554.6230 |
| 710 | -29555.7032 | 757 | -29555.5629 | 804 | -29554.6189 |
| 711 | -29555.7031 | 758 | -29555.5625 | 805 | -29554.6188 |
| 712 | -29555.7016 | 759 | -29555.5597 | 806 | -29554.6139 |
| 713 | -29555.7005 | 760 | -29555.5474 | 807 | -29554.5261 |
| 714 | -29555.7003 | 761 | -29555.5414 | 808 | -29554.5168 |
| 715 | -29555.7003 | 762 | -29555.4413 | 809 | -29554.3761 |
| 716 | -29555.7002 | 763 | -29555.1780 | 810 | -29554.3729 |
| 717 | -29555.6964 | 764 | -29555.1679 | 811 | -29554.3674 |
| 718 | -29555.6963 | 765 | -29555.1590 | 812 | -29554.3631 |
| 719 | -29555.6937 | 766 | -29555.1568 | 813 | -29554.1147 |
| 720 | -29555.6921 | 767 | -29555.1316 | 814 | -29553.8417 |
| 721 | -29555.6917 | 768 | -29555.1259 | 815 | -29553.8128 |
| 722 | -29555.6916 | 769 | -29555.1194 | 816 | -29553.5188 |
| 723 | -29555.6898 | 770 | -29555.1094 | 817 | -29553.5185 |
| 724 | -29555.6874 | 771 | -29555.1093 | 818 | -29553.4803 |
| 725 | -29555.6873 | 772 | -29555.0969 | 819 | -29553.3968 |
| 726 | -29555.6865 | 773 | -29555.0880 |     |             |
| 727 | -29555.6859 | 774 | -29554.9536 |     |             |
| 728 | -29555.6857 | 775 | -29554.9409 |     |             |
| 729 | -29555.6850 | 776 | -29554.9361 |     |             |
| 730 | -29555.6848 | 777 | -29554.9325 |     |             |
| 731 | -29555.6848 | 778 | -29554.9223 |     |             |
| 732 | -29555.6844 | 779 | -29554.9196 |     |             |
| 733 | -29555.6827 | 780 | -29554.9195 |     |             |
| 734 | -29555.6738 | 781 | -29554.9122 |     |             |
| 735 | -29555.6601 | 782 | -29554.9122 |     |             |
| 736 | -29555.6545 | 783 | -29554.9107 |     |             |
| 737 | -29555.6491 | 784 | -29554.9084 |     |             |
| 738 | -29555.6463 | 785 | -29554.9076 |     |             |
| 739 | -29555.6441 | 786 | -29554.9051 |     |             |

**Table S6.2:** Total enthalpies of fully-optimised structures (see [Figure 2](#)).

| Index | Enthalpy / eV |    |               |     |               |
|-------|---------------|----|---------------|-----|---------------|
| 1     | -31019.110225 | 45 | -31018.669925 | 90  | -31017.336042 |
| 2     | -31019.110155 | 46 | -31018.669913 | 91  | -31017.292564 |
| 3     | -31019.110058 | 47 | -31018.669885 | 92  | -31017.286389 |
| 4     | -31019.110055 | 48 | -31018.669885 | 93  | -31017.183684 |
| 5     | -31019.109645 | 49 | -31018.669837 | 94  | -31017.042073 |
| 6     | -31019.109543 | 50 | -31018.669804 | 95  | -31016.974390 |
| 7     | -31019.109377 | 51 | -31018.669799 | 96  | -31016.729304 |
| 8     | -31019.109367 | 52 | -31018.669789 | 97  | -31016.727409 |
| 9     | -31019.109335 | 53 | -31018.669727 | 98  | -31016.342548 |
| 10    | -31019.109328 | 54 | -31018.669655 | 99  | -31016.236552 |
| 11    | -31019.109311 | 55 | -31018.669471 | 100 | -31016.027601 |
| 12    | -31019.109287 | 56 | -31018.669405 | 101 | -31015.789085 |
| 13    | -31019.109261 | 57 | -31018.669280 | 102 | -31015.618683 |
| 14    | -31019.109241 | 58 | -31018.669040 | 103 | -31015.462839 |
| 15    | -31019.109155 | 59 | -31018.669029 |     |               |
| 16    | -31019.109141 | 60 | -31018.668788 |     |               |
| 17    | -31019.109018 | 61 | -31018.668482 |     |               |
| 18    | -31019.109010 | 62 | -31018.667846 |     |               |
| 19    | -31019.108995 | 63 | -31018.667805 |     |               |
| 20    | -31019.108938 | 64 | -31018.585085 |     |               |
| 21    | -31019.108838 | 65 | -31018.584103 |     |               |
| 22    | -31019.108820 | 66 | -31018.584036 |     |               |
| 23    | -31019.108709 | 67 | -31018.537492 |     |               |
| 24    | -31019.108670 | 68 | -31018.536166 |     |               |
| 25    | -31019.108666 | 69 | -31018.534626 |     |               |
| 26    | -31019.108631 | 70 | -31018.533708 |     |               |
| 27    | -31019.108590 | 71 | -31018.531184 |     |               |
| 28    | -31019.108573 | 72 | -31018.504152 |     |               |
| 29    | -31019.108221 | 73 | -31018.503743 |     |               |
| 30    | -31019.108031 | 74 | -31018.502555 |     |               |
| 31    | -31019.107959 | 75 | -31018.501984 |     |               |
| 32    | -31019.107807 | 76 | -31018.451537 |     |               |
| 33    | -31019.107431 | 77 | -31018.358249 |     |               |
| 34    | -31019.107088 | 78 | -31018.355731 |     |               |
| 35    | -31019.106923 | 79 | -31018.355494 |     |               |
| 36    | -31019.106895 | 80 | -31018.352805 |     |               |
| 37    | -31018.671057 | 81 | -31018.253577 |     |               |
| 38    | -31018.670534 | 82 | -31018.137916 |     |               |
| 39    | -31018.670421 | 83 | -31018.004477 |     |               |
| 40    | -31018.670184 | 84 | -31017.980107 |     |               |
| 41    | -31018.670184 | 85 | -31017.888192 |     |               |
| 42    | -31018.670125 | 86 | -31017.879992 |     |               |
| 43    | -31018.670039 | 87 | -31017.879901 |     |               |
| 44    | -31018.670010 | 88 | -31017.675581 |     |               |
|       |               | 89 | -31017.431967 |     |               |
